# Supplementary material
Source: PubMed Central journal article supplement (PMC8727629)

# SUPPLEMENTARY MATERIAL

## Supplementary methods

### Tumour analyses

TMA sections (4 µm) were stained with a multimarker panel including primary antibodies against CD3, CD8 and CD68 using fluorescence-based multiplex immunohistochemistry following the protocol described in (1). Briefly, a 5-plex stain was designed using the Opal™ Multiplex IHC method (PerkinElmer/Akoya, USA). Deparaffinization was performed in xylene, followed by hydration in graded alcohols. The Dako PT link module was used for heat-induced epitope retrieval for 20 min at 97 °C using the EnVision™ FLEX Target Retrieval Solution (3-in-1) pH 9 (Agilent/Dako, USA, catalogue number K800421-2) in 65 °C preheat mode. The Dako PT link module was also used for antibody stripping for 20 min at 97 °C using AR9 buffer (PerkinElmer/Akoya, USA, catalogue number AR9001KT) in 80 °C preheat mode (AR6 (PerkinElmer/Akoya, USA, catalogue number AR6001KT) was used prior to staining of cytokeratins/E-cadherin). Antibody staining was done using the Opal™ 4 Color Manual IHC Kit and an Opal 620 reagent pack (PerkinElmer/Akoya, USA, catalogue numbers NEL810001KT and FP1495001KT; kit contains blocking solution/antibody diluent, secondary antibody, Opal fluorophores and DAPI) according to the manufacturer's recommendations. Briefly, in each cycle following antigen retrieval/antibody stripping, tissue sections were incubated for 10 minutes with blocking solution prior to incubation with primary antibody solution for 30 minutes. After 3x2 minutes washes in TBST, the secondary antibody (PerkinElmer/Akoya, USA) was incubated for 10 minutes. A new 3x2 minutes wash cycle was performed before incubation with Opal fluorophore for 10 minutes. A final 3x2 minutes wash cycle was performed prior to antibody stripping. Monoclonal primary antibodies were chosen to facilitate reproducibility of the study since they are generally more specific than polyclonal antibodies, easier to reproduce and less affected by formalin fixation bias. The specific clones were selected based on comparative testing and quality assessments by the Nordic immunohistochemical Quality Control (NordiQC; nordiqc.org) organisation. The following primary antibodies and Opal fluorophores were used (in the order they were stained): CD68 (1:6000, clone KP1, Agilent/Dako, catalogue number M081401-2; detected by Opal 620 at 1:125); CD3 (1:400, clone F7.2.38, Agilent/Dako, catalogue number M725401-2; detected by Opal 570 at 1:100), CD8 (1:600, clone C8/144B, Agilent/Dako, catalogue number M710301-2; detected by Opal 520 at 1:100). The tissue was hybridised with a cocktail of epithelial markers in the last staining cycle to facilitate accurate epithelial

segmentation by the digital image analysis algorithm (anti-pan Cytokeratin (1:2000, clone C-11, Abcam, UK, catalogue number ab7753), anti-pan Cytokeratin Type I/II (1:1000, clone AE1/AE3, Thermo Fisher Scientific, USA, catalogue number MA5-13156) and anti-E-cadherin (1:10000, clone 36, BD Biosciences, USA, catalogue number 610182)); detected by Opal 690 at 1:100. DAPI (PerkinElmer/Akoya, USA) was used as counterstain prior to slide mounting with ProLong Diamond Antifade Mountant (Invitrogen/Thermo Fisher Scientific, USA, catalogue number P36970). All fluorophores were included in singleplex stains to create spectral libraries to unmix individual spectral signatures in the multiplex. The spectral signature of the tissue autofluorescence was obtained from a slide not probed with any fluorophore but otherwise treated as the other library stains. All markers were optimised prior to multiplex staining as follows. A separate test TMA (n = tissue cores = 166; 83 unique samples in duplicate), consisting of cores taken from a variety of tissues, including colorectal (normal (n = 12; 6 in duplicate) and cancer (n = 82; 41 in duplicate)) and lymph node tissues (n = 6; 3 in duplicate), as well as a broad variety of other normal tissues and cancers (including normal testis, prostate, liver, appendix, spleen, thymus and tonsil) was stained by conventional brown staining (3,3'-diaminobenzidine) for each marker individually to determine optimal antibody concentrations. Antibodies were then paired with an Opal fluorophore, and the test TMA was fluorescently labelled by each marker individually, along with DAPI (monoplex stain). A negative control experiment was performed where the primary antibody was omitted from one slide. These stains were compared to the brown stains to determine if antibody, or Opal fluorophore concentrations, needed fine-tuning to achieve optimal specificity and linear dynamic range. When optimal concentrations for fluorescent labelling were determined, a multiplex stain was performed on the test TMA and compared to the monoplex stains to ensure proper staining also when performing the sequential multiplex staining procedure (e.g., control for potential antigen blocking by the TSA reagent). Multiplex stains were optimised to achieve signal balance between the fluorophores to avoid potential signal bleedthrough and facilitate accurate unmixing of the fluorophore spectras. Finally, strip-testing was performed on the test TMA to ensure that antibodies were properly stripped away between each staining cycle. This was done by a regular cycle of staining with each antibody individually, followed by heat treatment in the PT link module and another cycle of staining using blocking solution, secondary antibody and the next fluorophore in the multiplex, but this time omitting any primary antibody. Images were then taken to verify that no signal above background values was detected from the second fluorophore applied.

## **Image acquisition and digital image analysis**

Multispectral images of the TMAs were acquired at 20x magnification (0.5  $\mu\text{m}/\text{pixel}$ ) using the Vectra 3.0 Automated Quantitative Pathology Imaging System, 200 slides (Vectra software

version 3, PerkinElmer/Akoya, USA). Four images (2x2) were taken of each tissue core. The standard setup for multispectral imaging was used, i.e. images were taken at 35 wavelengths across the five excitation filters. Exposure times for the various filters were as follows; DAPI: 50ms, FITC: 150ms, Cy3: 150ms, Texas Red: 150ms, Cy5: 150ms (however, of note, the system automatically limits the exposure if a fluorophore is in danger of becoming overexposed and this is later automatically adjusted for during calculations of fluorophore intensities in the accompanying inForm software). Multispectral image analysis of the multiplex stains was carried out with the inForm Image Analysis Software (version 2.3, Akoya Biosciences). Representative training images were initially loaded and spectrally unmixed with the spectral libraries generated from the individual fluorophore library stains and the autofluorescence slide. A machine-learning algorithm was then trained by user-specified tissue annotations aided by the epithelial markers' signal to segment tumour tissue *versus* stromal tissue and background. The segmentation of individual cells was based on the nuclear DAPI signal (specifically, in inForm, the minimum size for nuclei was set to 80 pixels, typical size was set to 320 pixels, minimum signal was set to 0.18, splitting was set to 2.26, growth of nuclei set to 0.35 and membrane signal was used to aid segmentation). CD68 signal was included for segmentation of cytoplasm in cells where this marker was detected (specifically, inner distance to the nucleus was set to 0 pixels, outer distance to the nucleus was set to 6 pixels, minimum size was set to 20 pixels, minimum signal was set to 0.3 with no bounds on the maximum). Membrane segmentation was aided by the signals from CD8 (full-scale count set to 10.9), CD3 (full-scale count set to 9.0) and the epithelial markers (full-scale count set to 8.7) with a maximum distance to membrane set to 12 pixels. See supplementary Figure S1 for representative examples from the image analysis in inForm. A review of all images was performed after batch processing. The raw file containing mean intensity signals per cell in the entire cohort was analysed using R software, version 3.3.1 (R Foundation for Statistical Computing, Vienna, Austria). No R packages (besides base packages) were used. A custom script was written to score cells as positive for a marker if mean signal intensities were above the threshold set for the marker. Cell densities were then calculated based on the number of positive cells within the tissue category (tumour epithelial tissue or stroma) or within the tissue core as a whole. For scoring cell positivity, the mean fluorescence intensity within the nuclear area of cells was used for CD3 and CD8, while mean cellular scores (within the nuclear, cytoplasmic and membrane area combined) were used for CD68. CD3 and CD8 cells were generally small and often tightly packed; thus, using the tighter segmentation of the nuclear area resulted in optimal scoring of these cells. However, using the entire cell area for mean fluorescence intensity-based scoring was visually found to be better for the generally larger CD68 macrophages (this is why only CD68 was used during cytoplasm segmentation). Positivity thresholds were set based on manual

inspection of representative images and after evaluating the expression distribution across all cells. To check the thresholds set, we also tested scoring cells with one threshold set below and one above the thresholds used to procure the final data. The data produced by using the lower and higher thresholds correlated well for each marker (Spearman's rho 0.84 - 0.93).

### Molecular alterations

For correct interpretation of *BRAF* V600E status, we assembled results from previous immunohistochemistry (IHC) for *BRAF* V600E (2), *BRAF* V600 pyrosequencing (3) and targeted *BRAF* sequencing in a customized Ampliseq hotspot gene panel (4). For inconsistent cases, pyrosequencing was redone before a final consensus was made. Eight cases were mutated according to IHC, but wildtype according to DNA based methods, these were considered wildtype. Four cases were mutated according to IHC and pyrosequencing, but wildtype according to hotspot panel sequencing with low variant allele frequency in three cases; these were considered mutated.

Results from previous pyrosequencing of *KRAS* codon 12 and 13 (3) and hotspot gene panel sequencing were compared (4). Pyrosequencing was redone for inconsistent results. Three cases were *KRAS* mutated according to pyrosequencing, but wildtype according to hotspot panel sequencing with low variant allele frequency; these were considered mutated. Two cases were removed from the final *KRAS* interpretation status due to inconsistent results.

1. Lopes N, Bergsland CH, Bjørnslett M, Pellinen T, Svindland A, Nesbakken A, et al. Digital image analysis of multiplex fluorescence IHC in colorectal cancer recognizes the prognostic value of CDX2 and its negative correlation with SOX2. *Lab Invest.* 2020;100(1):120-34.
2. Aasebo KO, Dragomir A, Sundstrom M, Mezheyeuski A, Edqvist PH, Eide GE, et al. Consequences of a high incidence of microsatellite instability and BRAF-mutated tumors: A population-based cohort of metastatic colorectal cancer patients. *Cancer Med.* 2019;8(7):3623-35.
3. Sorbye H, Dragomir A, Sundstrom M, Pfeiffer P, Thunberg U, Bergfors M, et al. High BRAF Mutation Frequency and Marked Survival Differences in Subgroups According to KRAS/BRAF Mutation Status and Tumor Tissue Availability in a Prospective Population-Based Metastatic Colorectal Cancer Cohort. *PLoS One.* 2015;10(6):e0131046.
4. Nunes L, Aasebo K, Mathot L, Ljungstrom V, Edqvist PH, Sundstrom M, et al. Molecular characterization of a large unselected cohort of metastatic colorectal cancers in relation to primary tumor location, rare metastatic sites and prognosis. *Acta Oncol.* 2020;59(4):417-26.

## Supplementary tables

**TABLE S1** Unadjusted non-parametric analysis of correlations between CD3, CD8 and CD68 tumour immune cell densities and clinic-pathological variables in a Scandinavian population-based cohort of metastatic colorectal cancer patients

|                                                                                                                                                                                                                                                                                                                                                                                                                                                                                                                                                                                                          |                | Missing | CD3        |                   | CD8        |                   | CD68       |                |
|----------------------------------------------------------------------------------------------------------------------------------------------------------------------------------------------------------------------------------------------------------------------------------------------------------------------------------------------------------------------------------------------------------------------------------------------------------------------------------------------------------------------------------------------------------------------------------------------------------|----------------|---------|------------|-------------------|------------|-------------------|------------|----------------|
| Characteristics                                                                                                                                                                                                                                                                                                                                                                                                                                                                                                                                                                                          |                | n       | Medians    | p-value           | Medians    | p-value           | Medians    | p-value        |
| Age (years)                                                                                                                                                                                                                                                                                                                                                                                                                                                                                                                                                                                              | < 75/> 75      |         | 56.1/ 70.3 | 0.163             | 36.9/ 45.9 | 0.090             | 46.6/ 35.0 | 0.165          |
| Gender                                                                                                                                                                                                                                                                                                                                                                                                                                                                                                                                                                                                   | Female/Male    |         | 60.2/ 58.9 | 0.820             | 41.2/ 38.9 | 0.577             | 40.0/ 43.3 | 0.587          |
| PS ECOG                                                                                                                                                                                                                                                                                                                                                                                                                                                                                                                                                                                                  | 0-1/>1         |         | 56.3/ 63.4 | 0.362             | 41.6/ 35.1 | 0.974             | 45.3/ 39.4 | 0.488          |
| Primary tumour location                                                                                                                                                                                                                                                                                                                                                                                                                                                                                                                                                                                  | Left / Right   | 7       | 53.9/ 65.5 | 0.200             | 32.2/ 50.5 | <b>0.001</b>      | 40.4/ 42.7 | 0.698          |
| Metastatic site                                                                                                                                                                                                                                                                                                                                                                                                                                                                                                                                                                                          |                |         |            |                   |            |                   |            |                |
| Liver                                                                                                                                                                                                                                                                                                                                                                                                                                                                                                                                                                                                    | absent/present |         | 55.7/ 62.3 | 0.879             | 53.5/ 33.0 | <b>0.002</b>      | 39.4/ 41.6 | 0.834          |
| Lung                                                                                                                                                                                                                                                                                                                                                                                                                                                                                                                                                                                                     | absent/present |         | 59.2/ 63.4 | 0.719             | 42.4/ 34.8 | 0.309             | 42.7/ 37.7 | 0.634          |
| Lymph node                                                                                                                                                                                                                                                                                                                                                                                                                                                                                                                                                                                               | absent/present |         | 62.9/ 53.3 | 0.387             | 37.5/ 47.4 | 0.159             | 39.1/ 47.1 | 0.431          |
| Peritoneum                                                                                                                                                                                                                                                                                                                                                                                                                                                                                                                                                                                               | absent/present |         | 63.4/ 45.6 | 0.219             | 40.6/ 39.4 | 0.882             | 43.4/ 29.1 | 0.392          |
| Bone                                                                                                                                                                                                                                                                                                                                                                                                                                                                                                                                                                                                     | absent/present |         | 59.5/ 63.4 | 0.575             | 40.8/ 34.7 | 0.667             | 43.4/ 17.4 | <b>0.010</b>   |
| Synchronous metastases                                                                                                                                                                                                                                                                                                                                                                                                                                                                                                                                                                                   | no/yes         |         | 63.3/ 56.3 | 0.920             | 43.0/ 35.1 | 0.632             | 35.8/ 45.3 | 0.396          |
| Primary tumour resected                                                                                                                                                                                                                                                                                                                                                                                                                                                                                                                                                                                  | no/yes         |         | 78.0/ 58.7 | 0.271             | 36.9/ 40.8 | 0.919             | 40.1/ 41.3 | 0.679          |
| Secondary metastasis surgery                                                                                                                                                                                                                                                                                                                                                                                                                                                                                                                                                                             | no/yes         | 1       | 58.3/ 69.0 | 0.200             | 38.5/ 51.4 | 0.227             | 39.6/ 50.8 | 0.311          |
| Preoperative radiotherapy                                                                                                                                                                                                                                                                                                                                                                                                                                                                                                                                                                                | no/yes         |         | 59.5/ 65.4 | 0.734             | 40.8/ 30.6 | 0.834             | 40.5/ 43.4 | 0.573          |
| Tumour grade                                                                                                                                                                                                                                                                                                                                                                                                                                                                                                                                                                                             | 1-2/3          | 15      | 64.3/ 53.7 | 0.241             | 38.5/ 47.2 | 0.669             | 39.2/ 52.8 | 0.242          |
| KRAS wildtype/mutation                                                                                                                                                                                                                                                                                                                                                                                                                                                                                                                                                                                   |                | 15      | 65.7/ 50.1 | 0.066             | 43.0/ 37.2 | 0.520             | 41.1/ 46.4 | 0.738          |
| BRAFV600E wildtype/mutation                                                                                                                                                                                                                                                                                                                                                                                                                                                                                                                                                                              |                |         | 56.3/ 62.7 | 0.391             | 37.0/ 47.2 | 0.065             | 40.5/ 42.6 | 0.311          |
| MSS/MSI                                                                                                                                                                                                                                                                                                                                                                                                                                                                                                                                                                                                  |                | 1       | 54.8/102.4 | <b>0.041</b>      | 35.1/141.4 | <b>&lt; 0.001</b> | 40.4/ 55.7 | 0.089          |
| CDX2 positive/negative                                                                                                                                                                                                                                                                                                                                                                                                                                                                                                                                                                                   |                | 2       | 59.5/ 62.7 | 0.846             | 38.7/ 44.1 | 0.227             | 40.4/ 51.3 | 0.366          |
| APC wildtype/mutation                                                                                                                                                                                                                                                                                                                                                                                                                                                                                                                                                                                    |                | 50      | 61.0/ 72.7 | 0.774             | 43.9/ 31.4 | <b>0.033</b>      | 49.4/ 41.9 | 0.828          |
| TP53 wildtype/mutation                                                                                                                                                                                                                                                                                                                                                                                                                                                                                                                                                                                   |                | 50      | 67.5/ 55.9 | 0.794             | 38.7/ 40.8 | 0.814             | 46.6/ 42.6 | 0.414          |
| PIK3CA wildtype/mutation                                                                                                                                                                                                                                                                                                                                                                                                                                                                                                                                                                                 |                | 50      | 60.6/ 69.6 | 0.736             | 36.0/ 60.1 | <b>0.027</b>      | 42.7/ 54.3 | 0.448          |
| SMAD4 wildtype/mutation                                                                                                                                                                                                                                                                                                                                                                                                                                                                                                                                                                                  |                | 50      | 65.3/ 55.2 | 0.353             | 39.4/ 42.6 | 0.317             | 46.6/ 33.0 | 0.181          |
|                                                                                                                                                                                                                                                                                                                                                                                                                                                                                                                                                                                                          |                |         | <b>rho</b> | <b>p-value</b>    | <b>rho</b> | <b>p-value</b>    | <b>rho</b> | <b>p-value</b> |
| CD68 density                                                                                                                                                                                                                                                                                                                                                                                                                                                                                                                                                                                             |                |         | 0.25       | <b>&lt; 0.001</b> | 0.26       | <b>&lt; 0.001</b> |            |                |
| Age (years)                                                                                                                                                                                                                                                                                                                                                                                                                                                                                                                                                                                              |                |         | 0.10       | <b>0.038</b>      | 0.10       | <b>0.030</b>      | -0.05      | 0.344          |
| Abbreviations: Median: median density of tumour infiltrating immune cells per mm <sup>2</sup> ; p-value: determined by non-parametric Mann-Whitney U test, except for continuous variables determined by Spearman's rank correlation; rho; Spearman's rank correlation coefficient; PS ECOG: performance status score developed by Eastern Cooperative Oncology Group; Right-sided: Site of primary colon cancer in ascending colon and transversum; Left-sided: Site of primary colon cancer in descending colon, sigmoid and rectum; Synchronous metastases: within six months after initial diagnoses |                |         |            |                   |            |                   |            |                |

**TABLE S2** Results from adjusted linear regressions of tumour infiltrating CD3 and CD8 lymphocytes and CD68 macrophages with respect to clinical and pathological variables in a Scandinavian population-based cohort of 376 metastatic colorectal cancer patients

| Variables                                                                                                                                                                                                                                                                                                                                                               | CD3 tumour density |               |         | CD8 tumour density |                |                   | CD68 tumour density |                |              |
|-------------------------------------------------------------------------------------------------------------------------------------------------------------------------------------------------------------------------------------------------------------------------------------------------------------------------------------------------------------------------|--------------------|---------------|---------|--------------------|----------------|-------------------|---------------------|----------------|--------------|
|                                                                                                                                                                                                                                                                                                                                                                         | B                  | 95 % CI       | p-value | B                  | 95 % CI        | p-value           | B                   | 95 % CI        | p-value      |
| Age > 75 years                                                                                                                                                                                                                                                                                                                                                          | 0.55               | (-0.84, 1.95) | 0.435   | 0.56               | (-0.69, 1.80)  | 0.382             | -0.93               | (-2.46, 0.61)  | 0.235        |
| Female                                                                                                                                                                                                                                                                                                                                                                  | -0.06              | (-1.33, 1.22) | 0.930   | -0.80              | (-1.94, 0.34)  | 0.167             | -0.38               | (-1.79, 1.02)  | 0.590        |
| PS ECOG > 1                                                                                                                                                                                                                                                                                                                                                             | 0.57               | (-0.86, 2.00) | 0.435   | 0.23               | (-1.05, 1.51)  | 0.722             | 0.94                | (-0.63, 2.51)  | 0.239        |
| Right-sided                                                                                                                                                                                                                                                                                                                                                             | 1.44               | (-0.02, 2.91) | 0.053   | 0.95               | (-0.37, 2.25)  | 0.159             | 0.03                | (-1.58, 1.64)  | 0.972        |
| Liver metastases                                                                                                                                                                                                                                                                                                                                                        | -0.26              | (-1.71, 1.19) | 0.725   | -1.31              | (-2.60, -0.01) | <b>0.048</b>      | -0.34               | (-1.94, 1.25)  | 0.673        |
| Lung metastases                                                                                                                                                                                                                                                                                                                                                         | -0.63              | (-2.16, 0.92) | 0.425   | -0.08              | (-1.46, 1.29)  | 0.904             | 0.13                | (-1.56, 1.82)  | 0.881        |
| Lymph node metastases                                                                                                                                                                                                                                                                                                                                                   | -0.50              | (-1.99, 0.98) | 0.505   | 0.18               | (-1.15, 1.51)  | 0.791             | 0.58                | (-1.05, 2.21)  | 0.486        |
| Peritoneal metastases                                                                                                                                                                                                                                                                                                                                                   | -0.60              | (-2.31, 1.10) | 0.487   | -0.53              | (-2.06, 1.00)  | 0.495             | -0.48               | (-2.35, 1.40)  | 0.618        |
| Bone metastases                                                                                                                                                                                                                                                                                                                                                         | -1.43              | (-4.04, 1.19) | 0.283   | -0.53              | (-2.87, 1.80)  | 0.653             | -3.34               | (-6.22, -0.47) | <b>0.023</b> |
| Synchronous metastases                                                                                                                                                                                                                                                                                                                                                  | -0.04              | (-1.42, 1.35) | 0.961   | -0.19              | (-1.42, 1.05)  | 0.764             | -0.59               | (-2.10, 0.93)  | 0.449        |
| Primary tumour resected                                                                                                                                                                                                                                                                                                                                                 | 1.58               | (-1.05, 4.22) | 0.238   | 0.86               | (-1.50, 3.21)  | 0.475             | -1.47               | (-4.37, 1.43)  | 0.319        |
| Secondary metastasis surgery                                                                                                                                                                                                                                                                                                                                            | 1.54               | (-0.93, 4.01) | 0.221   | 0.94               | (-1.27, 3.15)  | 0.403             | 1.37                | (-1.35, 4.08)  | 0.324        |
| Preoperative radiotherapy                                                                                                                                                                                                                                                                                                                                               | 0.46               | (-2.44, 3.35) | 0.757   | 1.54               | (-1.05, 4.12)  | 0.244             | -0.92               | (-4.10, 2.26)  | 0.570        |
| Tumour grade 3                                                                                                                                                                                                                                                                                                                                                          | -1.02              | (-2.75, 0.71) | 0.246   | -0.88              | (-2.43, 0.66)  | 0.261             | 0.47                | (-1.43, 2.37)  | 0.624        |
| KRAS mutation                                                                                                                                                                                                                                                                                                                                                           | -1.04              | (-2.52, 0.44) | 0.167   | -0.20              | (-1.52, 1.12)  | 0.769             | 1.39                | (-0.24, 3.01)  | 0.094        |
| BRAFV600E mutation                                                                                                                                                                                                                                                                                                                                                      | -0.69              | (-2.83, 1.45) | 0.526   | -0.20              | (-2.12, 1.71)  | 0.835             | 1.44                | (-0.92, 3.79)  | 0.231        |
| MSI                                                                                                                                                                                                                                                                                                                                                                     | 2.35               | (-0.47, 5.16) | 0.102   | 5.44               | (2.93, 7.96)   | <b>&lt; 0.001</b> | 2.45                | (-0.65, 5.54)  | 0.121        |
| CDX2 negative                                                                                                                                                                                                                                                                                                                                                           | 0.31               | (-1.55, 2.17) | 0.743   | 0.25               | (-1.41, 1.91)  | 0.768             | -0.39               | (-2.43, 1.66)  | 0.712        |
| APC mutation                                                                                                                                                                                                                                                                                                                                                            | 0.21               | (-1.16, 1.57) | 0.768   | -0.72              | (-1.94, 0.50)  | 0.244             | 0.00                | (-1.50, 1.50)  | 0.996        |
| TP53 mutation                                                                                                                                                                                                                                                                                                                                                           | 0.80               | (-0.48, 2.09) | 0.218   | -0.05              | (-1.19, 1.10)  | 0.938             | -0.75               | (-2.16, 0.67)  | 0.299        |
| PIK3CA mutation                                                                                                                                                                                                                                                                                                                                                         | 0.29               | (-1.34, 1.92) | 0.728   | 1.43               | (-0.03, 2.89)  | 0.054             | 0.22                | (-1.57, 2.02)  | 0.806        |
| SMAD4 mutation                                                                                                                                                                                                                                                                                                                                                          | -1.27              | (-3.26, 0.72) | 0.210   | -0.84              | (-2.61, 0.94)  | 0.355             | -1.12               | (-3.31, 1.06)  | 0.313        |
| Abbreviations: B: Regression coefficient calculated using square root of total number of positive cells per mm <sup>2</sup> ; Right-sided: Site of primary colon cancer in ascending colon and transversum; Left-sided: Site of primary colon cancer in descending colon, sigmoid and rectum; MSI: microsatellite instable high; CDX2 negative: loss of CDX2 expression |                    |               |         |                    |                |                   |                     |                |              |

**TABLE S3** Associations between different treatment decisions and tumour infiltration of CD3 and CD8 lymphocytes and CD68 macrophages in a population-based cohort of metastatic colorectal cancer patients (n = 448)

| Chemotherapy                                                                 | n   | CD3    |         | CD8    |         | CD68   |         |
|------------------------------------------------------------------------------|-----|--------|---------|--------|---------|--------|---------|
|                                                                              |     | Median | p-value | Median | p-value | Median | p-value |
| Prior adjuvant                                                               |     |        |         |        |         |        |         |
| Yes                                                                          | 67  | 40.5   | 0.046   | 38.0   | 0.945   | 33.2   | 0.235   |
| No                                                                           | 381 | 62.1   |         | 40.6   |         | 41.9   |         |
| 1 <sup>st</sup> line                                                         |     |        |         |        |         |        |         |
| Yes                                                                          | 280 | 56.3   | 0.254   | 38.5   | 0.313   | 45.2   | 0.699   |
| No                                                                           | 168 | 67.5   |         | 45.1   |         | 37.5   |         |
| 1 <sup>st</sup> line combination                                             |     |        |         |        |         |        |         |
| Yes                                                                          | 216 | 59.6   | 0.659   | 37.9   | 0.596   | 48.5   | 0.299   |
| No                                                                           | 64  | 50.0   |         | 43.4   |         | 36.9   |         |
| 2 <sup>nd</sup> line                                                         |     |        |         |        |         |        |         |
| Yes                                                                          | 162 | 61.3   | 0.523   | 36.5   | 0.385   | 61.8   | 0.021   |
| No                                                                           | 117 | 51.1   |         | 44.1   |         | 32.7   |         |
| 3 <sup>rd</sup> line                                                         |     |        |         |        |         |        |         |
| Yes                                                                          | 73  | 60.6   | 0.526   | 33.1   | 0.612   | 74.4   | 0.267   |
| No                                                                           | 89  | 63.3   |         | 40.6   |         | 49.4   |         |
| Abbreviations: p-value: determined by the non-parametric Mann-Whitney U-test |     |        |         |        |         |        |         |

**TABLE S4** Results from unadjusted Cox regression analyses of overall survival in a population-based Scandinavian cohort of metastatic colorectal cancer patients not given palliative chemotherapy (n = 168)

| Variable                                                                                                                                                                                                                                                                                                                                                                                                                                                                                                                                                              | n (%)   | HR   | 95 % CI      | p-value |
|-----------------------------------------------------------------------------------------------------------------------------------------------------------------------------------------------------------------------------------------------------------------------------------------------------------------------------------------------------------------------------------------------------------------------------------------------------------------------------------------------------------------------------------------------------------------------|---------|------|--------------|---------|
| <i>BRAF</i> V600E mutation                                                                                                                                                                                                                                                                                                                                                                                                                                                                                                                                            | 48 (22) | 1.67 | (1.20, 2.31) | 0.002   |
| CDX2 negative                                                                                                                                                                                                                                                                                                                                                                                                                                                                                                                                                         | 41 (24) | 1.84 | (1.28, 2.64) | 0.001   |
| MSI                                                                                                                                                                                                                                                                                                                                                                                                                                                                                                                                                                   | 19 (9)  | 1.76 | (1.08, 2.86) | 0.024   |
| CD3 density                                                                                                                                                                                                                                                                                                                                                                                                                                                                                                                                                           |         | 0.99 | (0.97, 1.02) | 0.657   |
| CD68 density                                                                                                                                                                                                                                                                                                                                                                                                                                                                                                                                                          |         | 1.00 | (0.98, 1.03) | 0.725   |
| CD8 density                                                                                                                                                                                                                                                                                                                                                                                                                                                                                                                                                           |         | 0.98 | (0.96, 1.01) | 0.173   |
| <i>Abbreviations:</i> n: number of patients; HR: hazard ratio; CI: confidence interval; p-value: from likelihood ratio test; MSI-H: microsatellite instable high; CD3 density: square root transformed number of tumour infiltrating CD3 lymphocytes per mm <sup>2</sup> tumour tissue microarray; CD8 density: square root transformed number of tumour infiltrating CD8 lymphocytes per mm <sup>2</sup> tumour tissue microarray; CD68 density: square root transformed number of tumour infiltrating CD68 macrophages per mm <sup>2</sup> tumour tissue microarray |         |      |              |         |

**TABLE S5** Results from Cox regression of progression-free survival in a population-based Scandinavian cohort of 244 metastatic colorectal cancer patients after 1<sup>st</sup> line chemotherapy

| Variable                                                                                                                                                                                                                                                                                                                                                                                                                                                                                                                                                                                                                                                                                                                                                                                                                                                                                                    | Unadjusted |      |              |         | Fully adjusted<br>(n = 244, e = 234) |              |         |
|-------------------------------------------------------------------------------------------------------------------------------------------------------------------------------------------------------------------------------------------------------------------------------------------------------------------------------------------------------------------------------------------------------------------------------------------------------------------------------------------------------------------------------------------------------------------------------------------------------------------------------------------------------------------------------------------------------------------------------------------------------------------------------------------------------------------------------------------------------------------------------------------------------------|------------|------|--------------|---------|--------------------------------------|--------------|---------|
|                                                                                                                                                                                                                                                                                                                                                                                                                                                                                                                                                                                                                                                                                                                                                                                                                                                                                                             | n/e        | HR   | 95 % CI      | p-value | HR                                   | 95 % CI      | p-value |
| Age, years                                                                                                                                                                                                                                                                                                                                                                                                                                                                                                                                                                                                                                                                                                                                                                                                                                                                                                  | 279/269    | 1.01 | (0.99, 1.02) | 0.395   | 1.00                                 | (0.98, 1.01) | 0.580   |
| Female                                                                                                                                                                                                                                                                                                                                                                                                                                                                                                                                                                                                                                                                                                                                                                                                                                                                                                      | 279/269    | 1.11 | (0.87, 1.41) | 0.409   | 0.87                                 | (0.65, 1.15) | 0.315   |
| PS ECOG                                                                                                                                                                                                                                                                                                                                                                                                                                                                                                                                                                                                                                                                                                                                                                                                                                                                                                     | 279/269    | 2.18 | (1.58, 3.00) | < 0.001 | 1.95                                 | (1.35, 2.83) | < 0.001 |
| Right-sided                                                                                                                                                                                                                                                                                                                                                                                                                                                                                                                                                                                                                                                                                                                                                                                                                                                                                                 | 276/266    | 1.02 | (0.79, 1.31) | 0.878   | 0.75                                 | (0.55, 1.03) | 0.074   |
| Tumour grade 3                                                                                                                                                                                                                                                                                                                                                                                                                                                                                                                                                                                                                                                                                                                                                                                                                                                                                              | 273/263    | 1.85 | (1.38, 2.47) | < 0.001 | 1.74                                 | (1.20, 2.51) | 0.004   |
| > 1 metastatic site                                                                                                                                                                                                                                                                                                                                                                                                                                                                                                                                                                                                                                                                                                                                                                                                                                                                                         | 279/269    | 1.41 | (1.11, 1.80) | 0.005   | 1.24                                 | (0.93, 1.66) | 0.141   |
| Synchronous metastasis                                                                                                                                                                                                                                                                                                                                                                                                                                                                                                                                                                                                                                                                                                                                                                                                                                                                                      | 279/269    | 0.95 | (0.75, 1.21) | 0.700   | 0.82                                 | (0.62, 1.09) | 0.175   |
| Secondary metastasis surgery                                                                                                                                                                                                                                                                                                                                                                                                                                                                                                                                                                                                                                                                                                                                                                                                                                                                                | 278/268    | 0.33 | (0.22, 0.49) | < 0.001 | 0.37                                 | (0.23, 0.60) | < 0.001 |
| ALP > UNL                                                                                                                                                                                                                                                                                                                                                                                                                                                                                                                                                                                                                                                                                                                                                                                                                                                                                                   | 264/254    | 1.54 | (1.20, 1.98) | 0.001   | 1.40                                 | (1.05, 1.88) | 0.023   |
| <i>BRAF</i> V600E mutation                                                                                                                                                                                                                                                                                                                                                                                                                                                                                                                                                                                                                                                                                                                                                                                                                                                                                  | 279/269    | 1.40 | (1.03, 1.91) | 0.032   | 1.20                                 | (0.79, 1.82) | 0.402   |
| <i>KRAS</i> mutation                                                                                                                                                                                                                                                                                                                                                                                                                                                                                                                                                                                                                                                                                                                                                                                                                                                                                        | 270/260    | 0.94 | (0.74, 1.21) | 0.630   | 1.55                                 | (1.13, 2.12) | 0.007   |
| CDX2 negative                                                                                                                                                                                                                                                                                                                                                                                                                                                                                                                                                                                                                                                                                                                                                                                                                                                                                               | 277/267    | 1.97 | (1.41, 2.75) | < 0.001 | 1.45                                 | (0.94, 2.25) | 0.093   |
| MSI-H                                                                                                                                                                                                                                                                                                                                                                                                                                                                                                                                                                                                                                                                                                                                                                                                                                                                                                       | 278/268    | 2.11 | (1.27, 3.53) | 0.004   | 2.39                                 | (1.15, 4.98) | 0.020   |
| CD3 density                                                                                                                                                                                                                                                                                                                                                                                                                                                                                                                                                                                                                                                                                                                                                                                                                                                                                                 | 279/269    | 0.99 | (0.97, 1.01) | 0.303   | 1.00                                 | (0.98, 1.03) | 0.533   |
| CD68 density                                                                                                                                                                                                                                                                                                                                                                                                                                                                                                                                                                                                                                                                                                                                                                                                                                                                                                | 279/269    | 0.98 | (0.97, 1.00) | 0.111   | 0.99                                 | (0.97, 1.02) | 0.533   |
| CD8 density                                                                                                                                                                                                                                                                                                                                                                                                                                                                                                                                                                                                                                                                                                                                                                                                                                                                                                 | 279/269    | 1.00 | (0.98, 1.02) | 0.948   | n.i.                                 |              |         |
| <i>Abbreviations:</i> n: number of patients; e: number of events; HR: hazard ratio; CI: confidence interval; p-value: from likelihood ratio test; PS ECOG: performance status score developed by Eastern Cooperative Oncology Group; Right-sided tumour: Site of colon cancer in ascending colon and transversum; Synchronous metastases: within six months after initial diagnoses; ALP > UNL: Alkaline Phosphatase above upper normal limit; MSI-H: microsatellite instable high; CD3 density: square root transformed number of tumour infiltrating CD3 lymphocytes per mm <sup>2</sup> tumour tissue microarray; CD8 density: square root transformed number of tumour infiltrating CD8 lymphocytes per mm <sup>2</sup> tumour tissue microarray; CD68 density: square root transformed number of tumour infiltrating CD68 macrophages per mm <sup>2</sup> tumour tissue microarray; n.i.: not included |            |      |              |         |                                      |              |         |

**TABLE S6** Results from fully adjusted Cox regression of overall survival in a population-based Scandinavian cohort of 245 metastatic colorectal cancer patients treated with 1<sup>st</sup> line chemotherapy

| n = 245, e = 230                                                                                                                                                                                                                                                                                                                                                                                                                                                                                                                                                                                                                                       |      |              |         |
|--------------------------------------------------------------------------------------------------------------------------------------------------------------------------------------------------------------------------------------------------------------------------------------------------------------------------------------------------------------------------------------------------------------------------------------------------------------------------------------------------------------------------------------------------------------------------------------------------------------------------------------------------------|------|--------------|---------|
| Variable                                                                                                                                                                                                                                                                                                                                                                                                                                                                                                                                                                                                                                               | HR   | 95 % CI      | p-value |
| Age, years                                                                                                                                                                                                                                                                                                                                                                                                                                                                                                                                                                                                                                             | 1.00 | (0.99, 1.01) | 0.965   |
| Female                                                                                                                                                                                                                                                                                                                                                                                                                                                                                                                                                                                                                                                 | 0.66 | (0.50, 0.88) | 0.005   |
| PS ECOG                                                                                                                                                                                                                                                                                                                                                                                                                                                                                                                                                                                                                                                | 2.20 | (1.53, 3.15) | < 0.001 |
| Right-sided                                                                                                                                                                                                                                                                                                                                                                                                                                                                                                                                                                                                                                            | 0.98 | (0.72, 1.33) | 0.872   |
| Tumour grade 3                                                                                                                                                                                                                                                                                                                                                                                                                                                                                                                                                                                                                                         | 1.72 | (1.19, 2.49) | 0.004   |
| > 1 metastatic site                                                                                                                                                                                                                                                                                                                                                                                                                                                                                                                                                                                                                                    | 1.34 | (1.00, 1.80) | 0.048   |
| Synchronous metastasis                                                                                                                                                                                                                                                                                                                                                                                                                                                                                                                                                                                                                                 | 0.81 | (0.62, 1.07) | 0.141   |
| Secondary metastasis surgery                                                                                                                                                                                                                                                                                                                                                                                                                                                                                                                                                                                                                           | 0.32 | (0.19, 0.52) | < 0.001 |
| ALP > UNL                                                                                                                                                                                                                                                                                                                                                                                                                                                                                                                                                                                                                                              | 1.83 | (1.37, 2.44) | < 0.001 |
| <i>BRAFV600E</i> mutation                                                                                                                                                                                                                                                                                                                                                                                                                                                                                                                                                                                                                              | 1.61 | (1.03, 2.52) | 0.036   |
| <i>KRAS</i> mutation                                                                                                                                                                                                                                                                                                                                                                                                                                                                                                                                                                                                                                   | 1.60 | (1.17, 2.18) | 0.003   |
| CDX2 negative                                                                                                                                                                                                                                                                                                                                                                                                                                                                                                                                                                                                                                          | 1.74 | (1.12, 2.70) | 0.013   |
| MSI-H                                                                                                                                                                                                                                                                                                                                                                                                                                                                                                                                                                                                                                                  | 3.35 | (1.64, 6.84) | 0.001   |
| CD3 high                                                                                                                                                                                                                                                                                                                                                                                                                                                                                                                                                                                                                                               | 0.73 | (0.55, 0.97) | 0.029   |
| CD68 high                                                                                                                                                                                                                                                                                                                                                                                                                                                                                                                                                                                                                                              | 0.61 | (0.46, 0.81) | 0.001   |
| <p><i>Abbreviations:</i> n: number of patients; e: number of events; HR: hazard ratio; CI: confidence interval; p-value: from likelihood ratio test; PS ECOG: performance status score developed by Eastern Cooperative Oncology Group; Right-sided tumour: Site of colon cancer in ascending colon and transversum; Synchronous metastases: within six months after initial diagnoses; ALP &gt; UNL: Alkaline Phosphatase above upper normal limit; MSI-H: microsatellite instable high; CD3 high: density of tumour infiltrating CD3 lymphocytes &gt; median value; CD68 high: density of tumour infiltrating CD68 macrophages &gt; median value</p> |      |              |         |

**TABLE S7** Results from Cox regression of overall survival according to MSI, BRAF and CDX2 status in subgroups with high (> median) and low density of tumour infiltrating CD3 lymphocytes and CD68 macrophages in a Scandinavian population-based cohort of metastatic colorectal cancer patients

| Variable                                                                                                                                                                                     | MSI     |      |              |         | BRAFV600E mutated |      |              |         | CDX2 loss |      |              |         |
|----------------------------------------------------------------------------------------------------------------------------------------------------------------------------------------------|---------|------|--------------|---------|-------------------|------|--------------|---------|-----------|------|--------------|---------|
|                                                                                                                                                                                              | n (%)   | HR   | 95 % CI      | p-value | n (%)             | HR   | 95 % CI      | p-value | n (%)     | HR   | 95 % CI      | p-value |
| CD3 low                                                                                                                                                                                      | 9 (4)   | 2.24 | (1.13, 4.44) | 0.021   | 41 (18)           | 1.60 | (1.13, 2.26) | 0.007   | 41 (18)   | 2.34 | (1.64, 3.33) | < 0.001 |
| CD3 high                                                                                                                                                                                     | 26 (12) | 2.85 | (1.86, 4.36) | < 0.001 | 50 (22)           | 1.80 | (1.31, 2.49) | < 0.001 | 42 (19)   | 2.10 | (1.48, 2.98) | < 0.001 |
| CD68 low                                                                                                                                                                                     | 15 (7)  | 1.51 | (1.08, 2.09) | 0.015   | 45 (20)           | 1.51 | (1.08, 2.09) | 0.015   | 39 (18)   | 2.00 | (1.40, 2.85) | < 0.001 |
| CD68 high                                                                                                                                                                                    | 20 (9)  | 2.52 | (1.56, 4.07) | < 0.001 | 46 (21)           | 1.86 | (1.33, 2.59) | < 0.001 | 44 (19)   | 2.39 | (1.69, 3.38) | < 0.001 |
| Abbreviations: n: number of patients with MSI, BRAF mutation or CDX2 loss; HR: hazard ratio; CI: confidence interval; p-value: from likelihood ratio test; MSI: microsatellite instable high |         |      |              |         |                   |      |              |         |           |      |              |         |

**FIGURE S1** Representative examples from the inForm software image analysis.

Raw images (top, white boxes indicate zoomed in portions of the images) were spectrally unmixed (middle top). Tissue autofluorescence was also unmixed in this step (omitted here for visualization purposes). Based on a user-trained machine learning algorithm, the tissue was segmented into specified categories (middle bottom). Finally, individual nuclei were segmented based on the DAPI signal (bottom), and cytoplasmic and membrane segmentation were aided by signals from CD68, CD3, CD8 and the epithelial markers, as described in the methods section. Signal detected within the nuclear area was used to score cells as CD3 and/or CD8 positive, while signal within the entire cell was used to score cells as CD68 positive (described in the methods section). Only nuclear segmentation is included in the figure for visualization purposes. All images were reviewed after batch analysis and regions of necrosis, folds or poor quality were excluded (illustrated by the dark regions in the tissue and cell segmentation maps for the core on the right). Scale bar equals 100  $\mu\text{m}$  in the images of the cores, while the portions in the lower corners are 5x further zoomed.

Raw multispectral  
RGB image

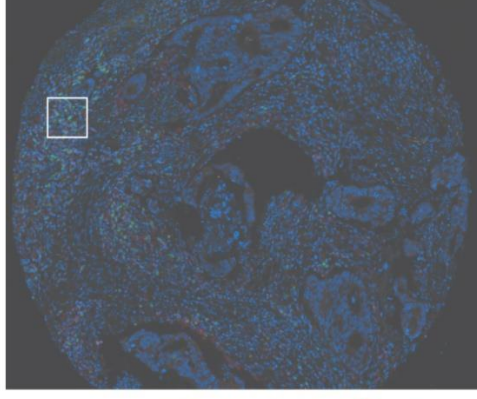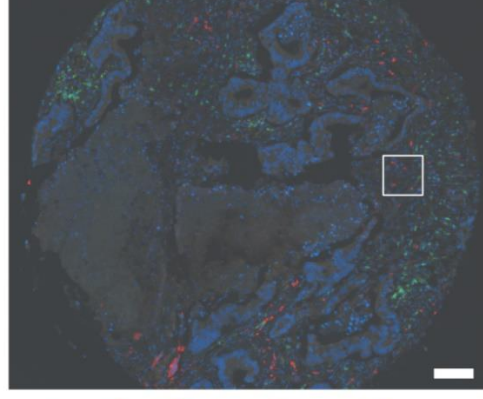

Spectrally unmixed  
image

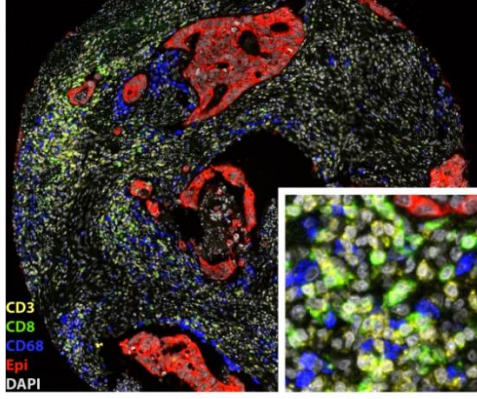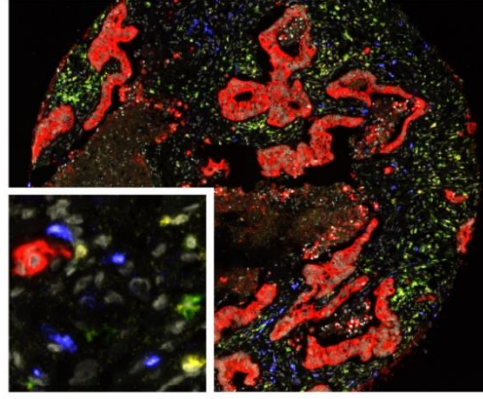

Tissue segmentation  
map

Epithelium  
Stroma  
Background  
Excluded

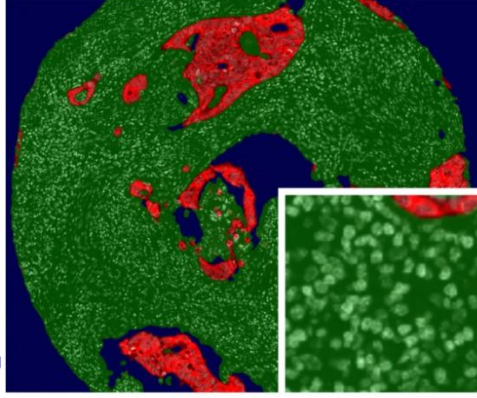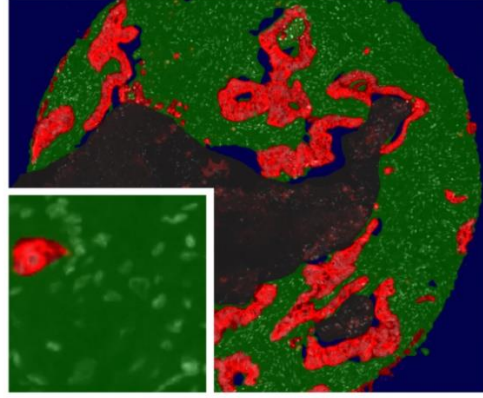

Cell segmentation  
map

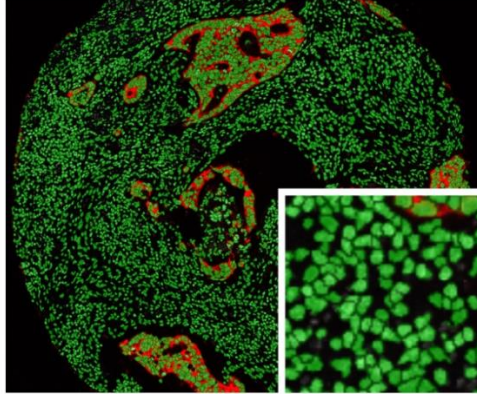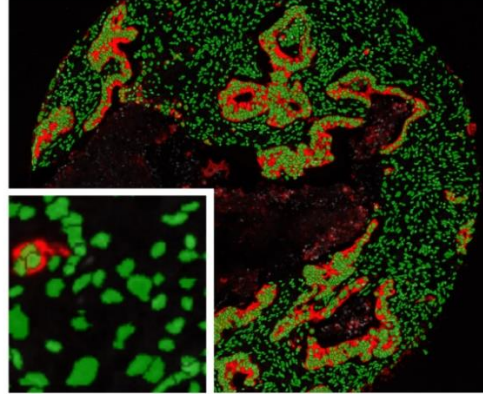

**Figure S2** Scatter plots demonstrating the correlation of immune cell density between two tumour cores taken from each patient in the generation of tissue microarray (TMA) in a Scandinavian population-based cohort of metastatic colorectal cancer patients (n=436). A) density of whole tissue CD3 lymphocytes B) density of whole tissue CD8 lymphocytes C) density of stroma CD68 macrophages. Abbreviations: p-value: determined by Spearman's rank correlation; rho; Spearman's rank correlation coefficient.

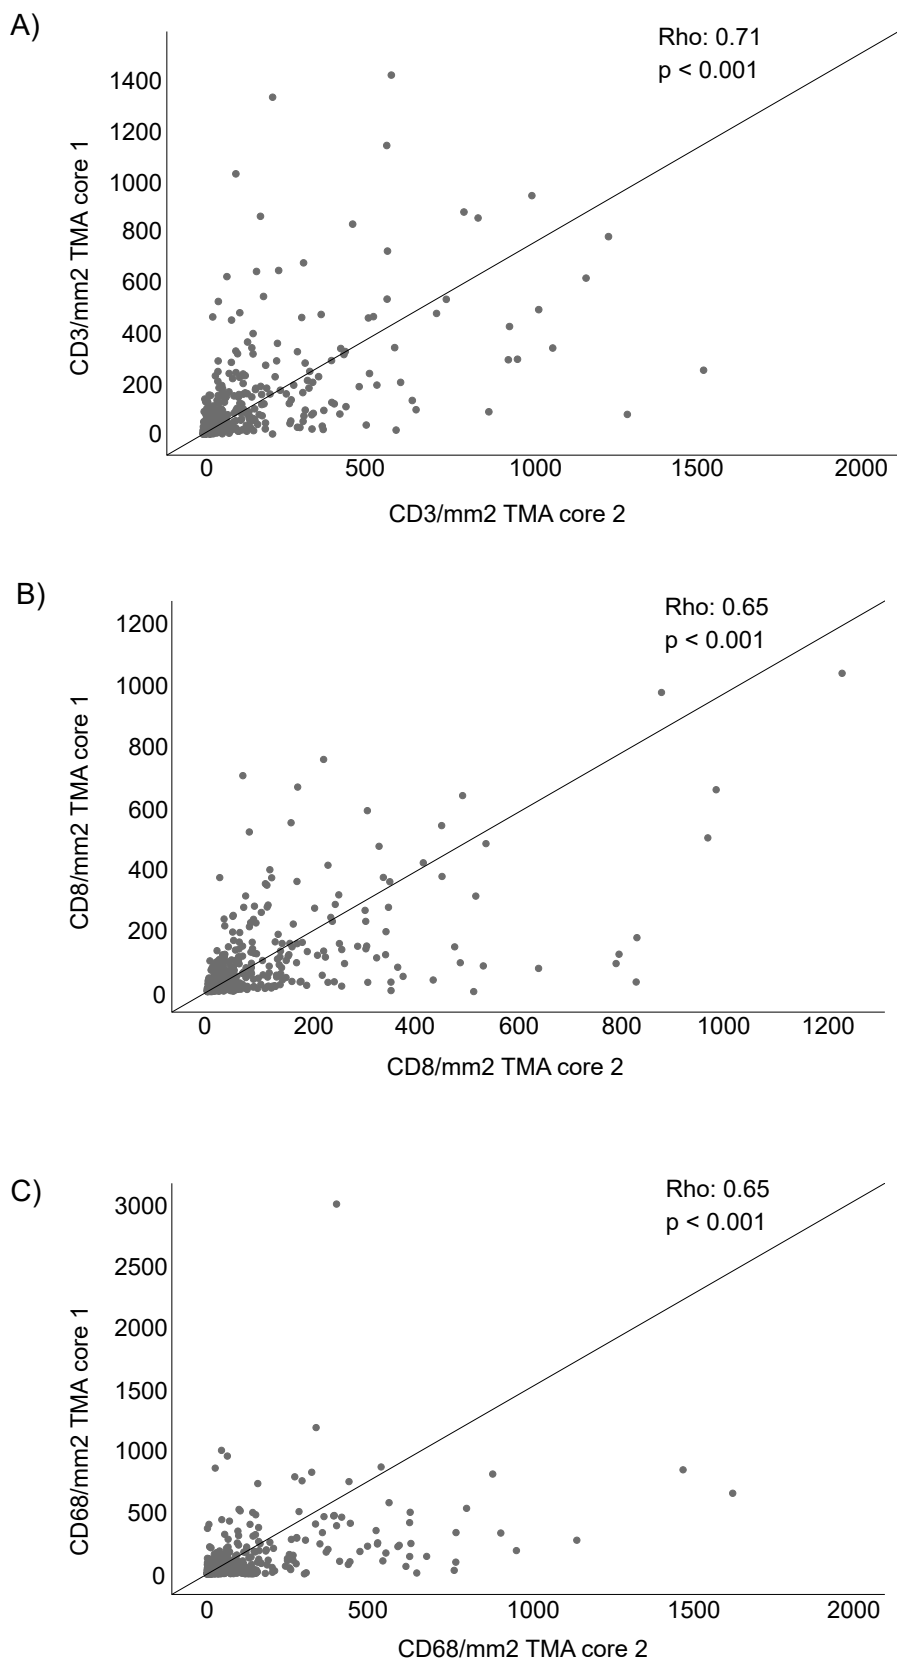

**FIGURE S3** Overall survival (OS) according to high (>median) vs low tumour infiltration of CD3 lymphocytes and CD68 macrophages and tumour molecular alterations in a Scandinavian population-based cohort of metastatic colorectal cancer treated with 1st-line chemotherapy. Kaplan-Meier curves were constructed, statistical significance test with the log-rank test for p-value and univariate cox regression for hazard ratio (HR) and 95% confidence interval (CI). A) OS of tumor infiltrating CD3 lymphocytes in subgroups of MSI and MSS cases B) OS according to tumour infiltrating CD3 lymphocytes in subgroups of *BRAF* mutated and wildtype cases C) OS according to tumour infiltrating CD3 lymphocytes in subgroups of CDX2 positive and negative cases D) OS of tumour infiltrating CD68 macrophages in subgroups of MSI and MSS cases E) OS according to tumour infiltrating CD68 macrophages in subgroups of *BRAF* mutated and wildtype cases F) OS according to tumour infiltrating CD68 macrophages in subgroups of CDX2 positive and negative cases

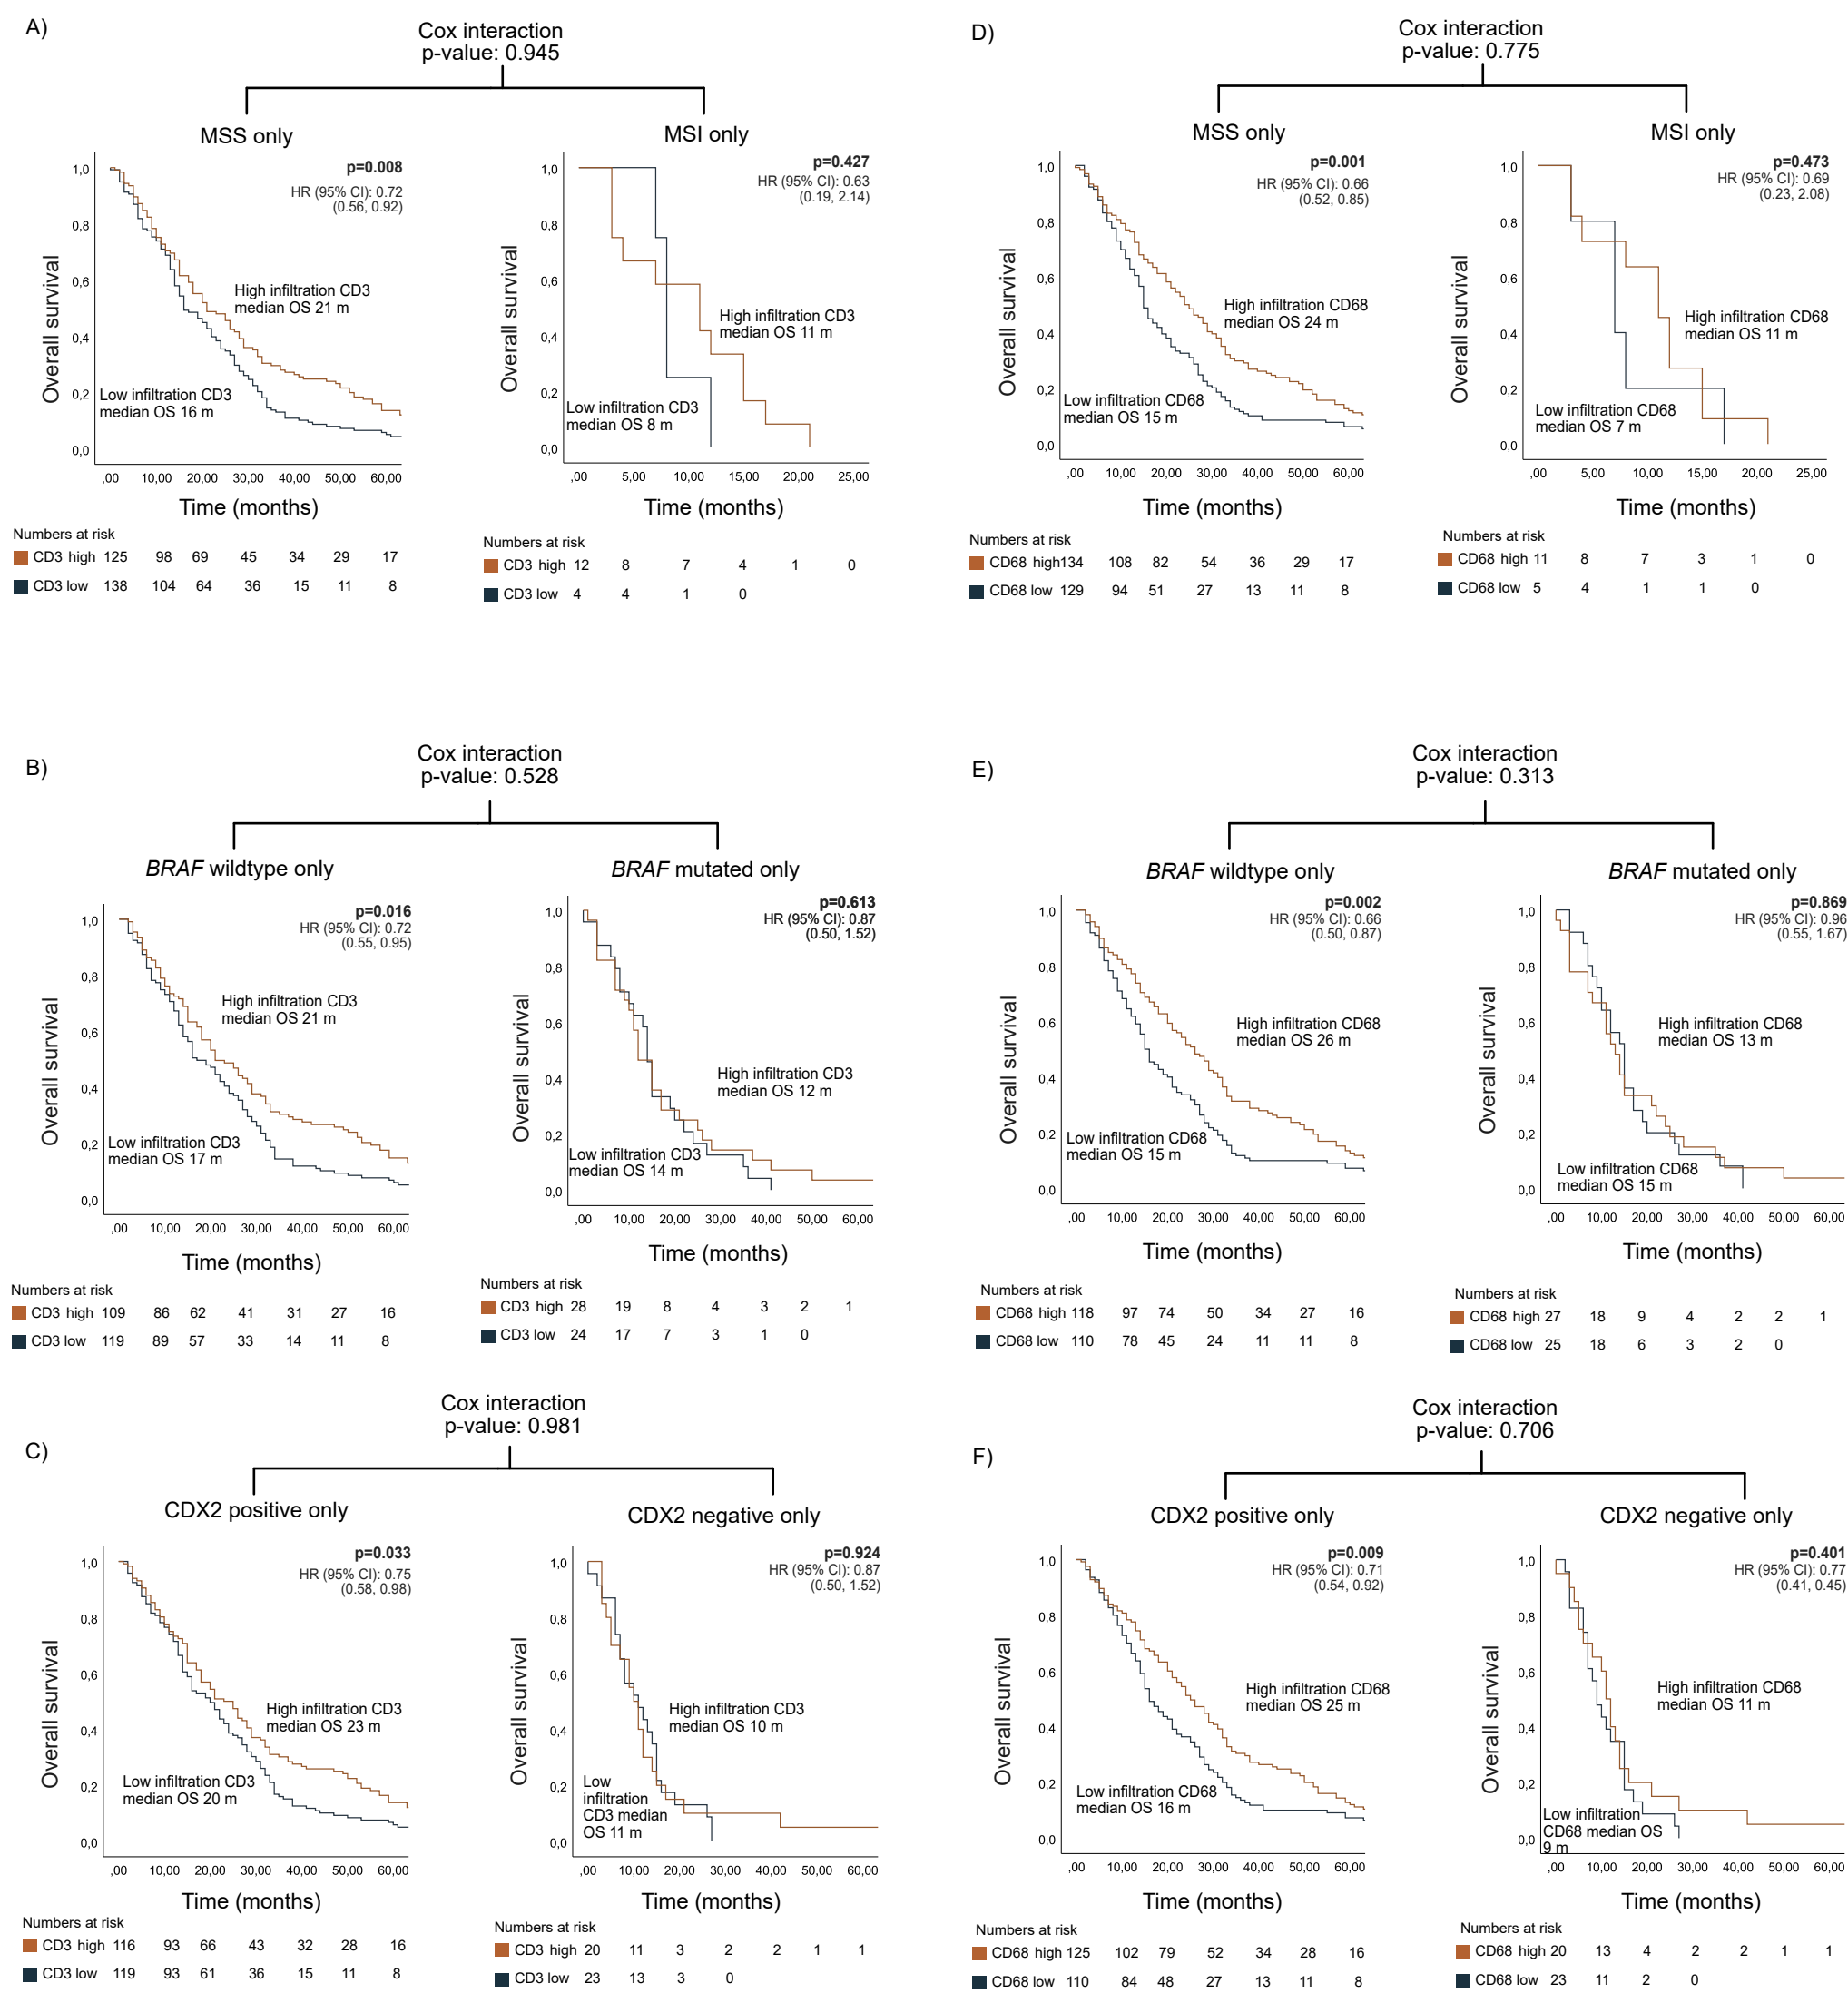

Supplement: 41416_2021_1586_MOESM1_ESM.pdf [file 41416_2021_1586_MOESM1_ESM.pdf]
